1 I'm alone but not lonely. U-shaped pattern of perceived loneliness during the  
2 COVID-19 pandemic in the UK and Greece

3 Alessandro Carollo<sup>1</sup>, Andrea Bizzego<sup>1</sup>, Giulio Gabrieli<sup>2</sup>, Keri Ka-Yee Wong<sup>3</sup>, Adrian  
4 Raine<sup>4</sup>, and Gianluca Esposito<sup>1,2,5</sup>

5 <sup>1</sup>Department of Psychology and Cognitive Science, University of Trento, Italy

6 <sup>2</sup>School of Social Sciences, Nanyang Technological University, Singapore

7 <sup>3</sup>Department of Psychology and Human Development, University College London,  
8 London, UK

9 <sup>4</sup>Departments of Criminology, Psychiatry, and Psychology, University of Pennsylvania

10 <sup>5</sup>Lee Kong Chian School of Medicine, Nanyang Technological University, Singapore

11

12 I'm alone but not lonely. U-shaped pattern of perceived loneliness during the  
13 COVID-19 pandemic in the UK and Greece

14 Many countries have adopted lengthy lockdown measures to mitigate the spreading of  
15 the COVID-19 virus. In this study, we train a RandomForest model using 10 variables  
16 quantifying individuals' living environment, physical and mental health statuses to  
17 predict how long each of the UK participants (N=382) had been in lockdown.  
18 Self-perceived loneliness was found to be the most important variable predicting time in  
19 lockdown and, therefore, the aspect most influenced by the time the participant spent  
20 in lockdown. Subsequent statistical analysis showed a significant U-shaped curve for the  
21 levels of perceived loneliness ( $p < 0.012$ ), specifically decreasing during the 4th and 5th  
22 lockdown weeks. The same pattern was found on data from Greek citizens (N=129,  
23  $p < 0.041$ ). These results suggest that lockdown measures may have affected how people  
24 evaluated their social support while in lockdown, leading to a decreased sense of  
25 loneliness. Implications of this study should be reflected on policies and  
26 countermeasures to current and future pandemics.

27 *machine learning; COVID-19; lockdown; loneliness; global study; mental health*

## 28 State of relevance

29 This study aims to inform policies for the current and/or future pandemics, particularly  
30 those involving lockdown restrictions. It highlights that self-perceived loneliness was the  
31 trait most affected by the time spent in lockdown: data show that the very first period  
32 of lockdown was characterised by a decrease in levels of perceived loneliness. The  
33 machine learning approach adopted and the statistical validation on two different  
34 Western European countries ensure that the uncovered pattern is substantial. This  
35 result highlights the dissociation between objective social support and perceived  
36 loneliness: initially, restrictions may have triggered better social behaviours among  
37 communities or increased the level of gratitude for the social support people have  
38 always received. The short duration of these desirable effects suggests that measures  
39 and campaigns promoting better social support strategies could be potentially effective,  
40 even in social isolation, to keep the levels of perceived loneliness low.

## Introduction

41

42 The 2019 SARS-CoV-2 (COVID-19) outbreak was declared as a pandemic by the World  
43 Health Organisation (WHO) on 11 March 2020. The number of positive cases  
44 worldwide at the time was 179,111 and deaths, 7,426 (Organization, 2020b).  
45 Globally, the months that followed saw a surge in the number of deaths and infection  
46 rates, which put further strain on the sanitary and economical balance of several  
47 countries. Fast forward to September 13th 2020, the total number of confirmed  
48 COVID-19 cases at 28,637,952 and 917,417 deaths have since been recorded  
49 (Organization, 2020a).

50 Expert concern for the mental health consequences of the current pandemic stems from  
51 the evidence that was obtained during smaller epidemics, such as SARS (severe acute  
52 respiratory syndrome), MERS (Middle East respiratory syndrome-related coronavirus),  
53 H1N1, and Ebola. From these previous health emergencies, short- and long-term effects  
54 on the healthcare workers' mental health, such as post-traumatic stress disorder  
55 (PTSD) (S. M. Lee et al., 2018; Maunder et al., 2006), depression (A. M. Lee et al.,  
56 2007; Liu et al., 2012), anxiety (A. M. Lee et al., 2007), stress and burnout (Maunder  
57 et al., 2006) symptoms were common (Prete et al., 2020). There is evidence that  
58 healthcare workers are distressed from the epidemics, during and after emergencies, and  
59 that these effects also extend to the general population in the form of severe anxiety,  
60 post-traumatic stress disorder, depression and increased rates of substance abuse  
61 (Brooks et al., 2020; Haider et al., 2020; Lau et al., 2005; Main et al., 2011; Mak et al.,  
62 2009; Zhang & Ma, 2020). Although some promising results from vaccine trials are  
63 starting to emerge, the novel and highly infective virus continues to force governments  
64 around the world to limit people's movements and, in some cases, re-adapt lockdown  
65 restrictions once again, as in the case of the UK on September 22nd, 2020.

66 Closing schools and universities, shutting non-essential businesses, enforcing working  
67 from home policies and online teaching, struggling with financial difficulties and leaving  
68 the house only for necessities have fuelled genuine and perceived health threats that  
69 have rapidly become ubiquitous for large populations worldwide. While restrictions

70 have helped flatten the infection curve, legitimate concerns about the physical and  
71 mental health consequences have been raised. As such, this pandemic, as an extreme  
72 global stressor, has provided an unprecedented opportunity for researchers to  
73 investigate how several aspects of our personal life, and specifically our mental health,  
74 are affected by prolonged isolation and restrictions. Social isolation is one known threat  
75 to mental and physical well-being (Hall-Lande et al., 2007; Valtorta et al., 2016) and an  
76 established risk factor for mortality (Alcaraz et al., 2019; Cacioppo et al., 2015;  
77 Holt-Lunstad et al., 2015). Social isolation is associated with poor sleep quality  
78 (Friedman, 2011) and with an increased risk of cognitive decline (Barnes et al., 2004).  
79 The fact that our perception of self is ingrained in the social comparison with others  
80 (Festinger, 1954) suggests that social isolation may not be an ideal situation for the  
81 development of our identity either. Latest COVID-19 studies of the first weeks of  
82 lockdown have already documented psychological distress, such as depression, anxiety,  
83 post-traumatic stress and insomnia in Italy (Castelli et al., 2020; Gualano et al., 2020;  
84 Rossi et al., 2020) and China (Ahmed et al., 2020; Wang et al., 2020), the two countries  
85 most severely hit by COVID-19 at the beginning of the pandemic, as well as Austria  
86 (Pieh et al., 2020) and Switzerland (Elmer et al., 2020). In fact, with some preliminary  
87 results on COVID-19 restrictions, this paper aims to add a piece of knowledge to the  
88 existing literature to provide a scientific contribution and help governments in the  
89 design of future possible lockdowns. Against this backdrop of existing psychological  
90 consequences from lockdown, this study focuses on the physical and psychological  
91 constructs that best predict the time spent in lockdown (TIL).

92

## Methods

### 93 Questionnaire

94 A 20-minute online survey (available in 7 languages) was administered through the  
95 website [www.GlobalCOVIDStudy.com](http://www.GlobalCOVIDStudy.com) between 17 April 2020 and 10 July 2020 to  
96 participants aged 18 years and above who had access to the survey link. This was  
97 distributed using various social media channels (email, LinkedIn, Whatsapp, Instagram,

98 Facebook and Reddit). The survey was designed by the Global COVID Study team in  
99 order to explore participants' moods and behaviours. The battery of questionnaires  
100 consisted of 359 questions assessing 13 main domains: social suspicions, schizotypal  
101 traits, physical health, sleep quality, aggression, empathy, anxiety, depression, worries  
102 and stress, loneliness, parenting style, Special Educational Needs and demographic  
103 information (see <https://osf.io/fe8q7> for more details). The study was approved by the  
104 UCL Ethics Committee (REC 1331).

## 105 **Participants**

106 Participants for the study were recruited through convenience sampling and, eventually,  
107 a total of 2,276 people (aged 18 and above) from 66 countries completed the survey  
108 during lockdown. Respondents who did not give consent to treat their data ( $N = 32$ ),  
109 with incomplete ( $N = 712$ ) or missing data ( $N = 294$ ), or who could not complete the  
110 survey within two days from their enrollment ( $N = 76$ ) were excluded. To train the  
111 Random Forest, we chose not to consider the participants who took more than one day  
112 because the process required the model to find patterns of dependency between the  
113 features and the amount of time spent in lockdown. Considering the fact that, in our  
114 hypothesis, the time in lockdown played a role in determining the variability of the  
115 selected features, by considering only the participants who completed the survey within  
116 the same day, we aimed at reducing possible confounds. Furthermore, participants who  
117 completed the survey from a country that was different from the one they were a  
118 resident of were excluded from the study ( $N = 132$ ). Considering the variety of  
119 lockdown measures across the world, this criterion was adopted in order to reduce  
120 possible confounds given by the type of restrictions adopted by individual countries.  
121 Another possible confound came from the fact that not all the governments decided to  
122 adopt lockdown restrictions against the pandemic and, when they did, different  
123 countries entered the lockdown on different dates. For these reasons, among the  
124 countries that adopted these restrictions, the new variable "Weeks in lockdown" - the  
125 time of survey completion - was computed for each participant. Thus, participants were

126 grouped and compared regardless of the specific date in which their countries decided to  
127 adopt restrictions, but uniquely by the amount of time spent in lockdown. Within this  
128 pool of data, the UK and Greece samples were selected for the analysis conducted in  
129 this study. Three main reasons drove the choice of using data from these two countries:  
130 a) the sample sizes (>100 cases); b) the existence of a clear date of lockdown beginning;  
131 and c) the same time span (weeks in lockdown) covered. To maintain the coverage on  
132 the same time period, UK participants that completed the survey after week 9 of  
133 lockdown were excluded from the study (N = 40). To summarise, the UK sample  
134 consisted of 382 participants (Gender: Female = 302, Male = 71, Non-binary = 4,  
135 Prefer not to say = 2, Self-identified = 3; Age: mean = 37.18; SD = 13.15), while the  
136 Greek sample counted 129 participants (Gender: Female = 92, Male = 37; Age: Mean  
137 = 36.08, SD = 10.79) (see Table 1).

## 138 **Data Analysis**

139 From the dataset, 10 variables capturing participants' living environment, mental and  
140 physical health were selected (see Table 2). This procedure aimed to remove the noise  
141 in the dataset by discarding the non-informative variables. All the variables for which  
142 scores could not show a variation caused by the amount of time in lockdown were  
143 excluded. Some examples of these variables are gender, ethnicity, dimensions of one's  
144 house, and other similar variables. Moreover, considering the criteria for which data  
145 from participants could potentially have at least one NA data were not considered for  
146 the analysis, the next step of the selection was to optimise the number of participants  
147 by not considering the variables that had a large amount of NA data.

148 In order to investigate the role of time spent in lockdown on modulating the effects of  
149 lockdown restrictions (study pre-registration: <https://osf.io/8xtbq> ), the study  
150 consisted of two parts. In the first, we aimed at understanding which aspect was most  
151 sensitive to time. In other words, which part of our physical and mental life was  
152 affected the most by the time in lockdown. In the second, the interest was on how this  
153 most sensitive aspect was modulated by the time.

154 **Identification of the most influential variable.** Without any available literature  
155 to guide our hypothesis in identifying the variable that is most influenced by TIL, we  
156 adopted a data-driven Machine Learning approach where a RandomForest (Breiman,  
157 2001) regression model was trained to predict the week in which each participant  
158 completed the survey, based on the total scores of the 10 selected variables. The model  
159 creates an ensemble of decision trees based on the predictive information of the input  
160 variables. The performance of the model was evaluated based on Mean Squared Error  
161 (MSE). The data used to train the RandomForest model were those of the 382 UK  
162 residents who were in the UK at the time of participation in this study. Initially, the  
163 dataset was partitioned into train (75% of participants) and test (25% of participants).  
164 The training process was repeated and evaluated several times on different randomized  
165 folds of the train dataset to optimize the number of decision trees and rank the  
166 variables based on their importance. A Borda count (Jurman et al., 2012) was then  
167 computed on the rankings of variables obtained from each training iteration to identify  
168 the most important variable to predict the week of survey completion. The optimal  
169 number of decision trees that emerged from the training was 50. The final model, with  
170 the optimal number of trees, was then trained on the whole train partition and  
171 evaluated on the test partition. The adopted training scheme is standardized and was  
172 derived from bioinformatics applications that are used to identify clinical biomarkers  
173 from genetic data (Consortium et al., 2010).

174 **Statistical validation.** In the second part of the study, we used a Kruskal-Wallis test  
175 to assess whether the most important variable (identified by the RandomForest model)  
176 significantly changes during the lockdown from weeks 3 to 7. In case of significant  
177 results, we adopted post-hoc Kruskal-Wallis tests to compare pairwise the 3rd week  
178 with the 4th to 7th weeks. The Bonferroni method was used to correct the significance  
179 level for multiple comparisons. In conducting statistical analyses, we first focused on  
180 the same set of participants used to train the RandomForest model, then we validated  
181 results on the dataset of participants from Greece.

## Results

MSE on the training and the test partitions was 1.33 and 1.94 respectively and the feature with the highest importance was perceived loneliness (see Figure 1). Notably, scores of perceived loneliness decreased during weeks 3 to 5 after lockdown and subsequently increased in the following weeks, returning to the initial values (see Figure 2). The Kruskal-Wallis test on the data of UK participants from the 3rd to 7th week confirmed that at least one week was statistically different from the others ( $H=12.86$ ,  $p=0.012$ ). We then compared the 4th, 5th, 6th and 7th week with the 3rd. Significant differences were found for the 4th ( $H=11.360$ ,  $p=0.001$ ) and 5th ( $H=7.077$ ,  $p=0.008$ ) week, but not for the 6th ( $H=4.011$ ,  $p=0.045$ ) and the 7th ( $H=0.368$ ,  $p=0.544$ ) week. The same procedure was repeated on participants from Greece, focusing only on the 3rd to 6th weeks, as only one participant completed the survey during the 7th week. The results confirmed that perceived loneliness significantly changes over weeks 3 to 6 ( $H=8.27$ ,  $p=0.041$ ), with a significant difference between the 3rd and the 5th weeks ( $H=7.6$ ,  $p=0.006$ ). The difference between the 3rd and the 4th weeks ( $H = 3.87$ ,  $p=0.049$ ) failed to survive the Bonferroni correction. No difference was found between the 3rd and the 6th week ( $H=0.68$ ,  $p=0.408$ ).

## Discussion

The aim of this study was to assess the impact of lockdown restrictions on people's mental and physical health. Although we adopted a rigorous methodology to train the predictive model, the achieved performances on train and test partitions are low: this outcome reflects the complexity of the psycho-social mechanisms that were at play during the lockdown period. While the questionnaires aimed at quantifying a broad range of the aspects of interest, other aspects may not have been observed. Additionally, this study investigated the temporal variations of these mechanisms, whose effects on the observed variables might be even more difficult to identify. That said, one advantage of the machine learning approach is that it permits the identification of variables that are more sensitive to the time spent in lockdown, rather



210 than a focus on predictive capability.

211 The low performance does not affect the reliability of the ranking of the variables,  
212 which identified perceived loneliness as the most sensitive variable. Perceived loneliness  
213 in the UK decreased during the first 4-5 weeks after the start of the lockdown, before  
214 returning to initial values afterwards. The pattern was replicated in the Greek sample,  
215 albeit in a smaller group of participants. This confirms that perceived loneliness does  
216 capture a sensitive decrease during weeks 4-5 since the start of lockdown.

217 These results are somewhat surprising. In the emerging literature about COVID-19, the  
218 number of friends and one's social support seem to play a protective role against the  
219 effect of lockdown on loneliness (Bu et al., 2020a, 2020b). Counterintuitively, from our  
220 study it emerged that, even though a large part of the global population was not able to  
221 see their close friends, partner and family, levels of perceived loneliness interestingly  
222 decreased during the initial period of lockdown. The dissociation between the objective  
223 and the subjective degrees of social support has been largely discussed in the existing  
224 literature (Cacioppo & Hawkley, 2009; Hawkley et al., 2008). It is believed that  
225 perceived social isolation represents a quantitative or (more often) qualitative mismatch  
226 between an individual's need for social support and the subjective evaluation of the  
227 social support that is obtained (Hawkley & Capitanio, 2015). In other words, the  
228 feeling of loneliness, resulting from the perception of social isolation, seems to depend,  
229 more than on an objective condition of isolation, on a cognitive evaluation and  
230 perception of the social environment. In the existing literature, the feeling of loneliness  
231 emerged to be connected to the concept of Self (Goswick & Jones, 1981), the person's  
232 cognitive functioning (Cacioppo & Hawkley, 2009) and, in general, the mental and  
233 physical well-being of the individual (Cacioppo et al., 2015; Holt-Lunstad et al., 2015;  
234 Richardson et al., 2017; Valtorta et al., 2016). For instance, lonely people are more  
235 likely to suffer from depression (Jackson & Cochran, 1991; Mushtaq et al., 2014),  
236 Alzheimer's disease (Holwerda et al., 2014; Mushtaq et al., 2014), alcoholism (Åkerlind  
237 & Hörnquist, 1992; Hawkley & Cacioppo, 2010; Mushtaq et al., 2014), suicide (Mushtaq  
238 et al., 2014; Stravynski & Boyer, 2001), personality disorders (Mushtaq et al., 2014) and

239 sleep problems (Mushtaq et al., 2014). It is not yet clear the reason behind the results  
240 that emerged from this study, but some hypotheses can be advanced. For instance,  
241 considering the definition of loneliness as a mismatch between desired and obtained  
242 social support, the decrease of its levels in the first weeks of lockdown could signify that  
243 people in that period of time were receiving the desired social support or even more of  
244 it in terms of quantity, or that it is higher in quality. On the other hand, loneliness  
245 could decrease as a result of a drop in the standards used for evaluating the received  
246 social support. In times of danger, this could be an adaptive feature, for it could  
247 facilitate behaviours of affiliation among people of the same group. As a matter of fact,  
248 facing an external threat has the short-term effect of increasing cohesiveness among the  
249 members of a group (Sherif et al., 1961; Staw et al., 1981). The threat of external  
250 dangers (such as invaders) has often been used from past and present political leaders in  
251 order to rule their countries and to increase the sense of community among the  
252 population. It is possible that not only personified external threats like foreigners trying  
253 to invade one's country, but also environmental dangers, such as the COVID-19  
254 pandemic, can directly modulate the degree of cohesiveness among the members of a  
255 group, in this case an entire population of a country. As a matter of fact, this increased  
256 cohesion could have had a role in the initial decrease in levels of perceived loneliness  
257 that we observed among people from the UK and Greece. Even though no certain  
258 explanation can be given for understanding the observed patterns of perceived  
259 loneliness, the findings of this study support the idea that social isolation (as the  
260 objectively low social support) and loneliness (as the subjectively low social support)  
261 are different concepts, not necessarily linked to each other, as philosophers in the past  
262 centuries have largely pointed out. Having observed that lockdown restrictions have  
263 short-term effects on people's feeling of loneliness and not knowing the real meaning  
264 behind these observed patterns, in our opinion, the design of possible future lockdown  
265 measures should be accompanied by the consideration of the role played by real and  
266 perceived social support for people's physical and mental well-being.

267

### **Author contribution**

268 Conceptualization: A.B., G.G., K.K.W., G.E.; Data curation: A.C., A.B., G.G.,  
269 K.K.W.; Data analysis, Data interpretation, Writing: A.C., A.B.; Revision: A.C., A.B.,  
270 G.G., K.K.W., A.R., G.E.; Supervision: G.E. All authors read and agreed to the  
271 published version of the manuscript.

272

### **Conflicts of interest**

273 The authors declare no conflict of interest.

274

### **Ethics**

275 Ethical approval for the COVID-19 Social Study was granted by the UCL Ethics  
276 Committee (REC 1331). The study is GDPR compliant.

277

### **Funding**

278 This research is supported by Nanyang Technological University (Singapore) under the  
279 NAP-SUG grant (G.E.).

References

280

281 Ahmed, M. Z., Ahmed, O., Aibao, Z., Hanbin, S., Siyu, L. & Ahmad, A. (2020).

282 Epidemic of covid-19 in china and associated psychological problems. *Asian*  
283 *journal of psychiatry*, 102092.

284 Åkerlind, I. & Hörnquist, J. O. (1992). Loneliness and alcohol abuse: A review of  
285 evidences of an interplay. *Social science & medicine*, 34(4), 405–414.

286 Åkerstedt, T. & Gillberg, M. (1990). Subjective and objective sleepiness in the active  
287 individual. *International Journal of Neuroscience*, 52(1-2), 29–37.

288 Alcaraz, K. I., Eddens, K. S., Blase, J. L., Diver, W. R., Patel, A. V., Teras, L. R.,  
289 Stevens, V. L., Jacobs, E. J. & Gapstur, S. M. (2019). Social isolation and  
290 mortality in us black and white men and women. *American journal of*  
291 *epidemiology*, 188(1), 102–109.

292 Barnes, L. L., De Leon, C. M., Wilson, R. S., Bienias, J. L. & Evans, D. A. (2004).  
293 Social resources and cognitive decline in a population of older african americans  
294 and whites. *Neurology*, 63(12), 2322–2326.

295 Breiman, L. (2001). Random forests. *Machine learning*, 45(1), 5–32.

296 Brooks, S. K., Webster, R. K., Smith, L. E., Woodland, L., Wessely, S., Greenberg, N.  
297 & Rubin, G. J. (2020). The psychological impact of quarantine and how to  
298 reduce it: Rapid review of the evidence. *The Lancet*.

299 Bu, F., Steptoe, A. & Fancourt, D. (2020a). Loneliness during a strict lockdown:  
300 Trajectories and predictors during the covid-19 pandemic in 38,217 united  
301 kingdom adults. *Social Science & Medicine*, 113521.

302 Bu, F., Steptoe, A. & Fancourt, D. (2020b). Who is lonely in lockdown? cross-cohort  
303 analyses of predictors of loneliness before and during the covid-19 pandemic.  
304 *medRxiv*.

305 Buysse, D. J., Reynolds III, C. F., Monk, T. H., Berman, S. R. & Kupfer, D. J. (1989).  
306 The pittsburgh sleep quality index: A new instrument for psychiatric practice  
307 and research. *Psychiatry research*, 28(2), 193–213.

- 308 Cacioppo, J. T., Cacioppo, S., Capitanio, J. P. & Cole, S. W. (2015). The  
309 neuroendocrinology of social isolation. *Annual review of psychology*, *66*, 733–767.
- 310 Cacioppo, J. T. & Hawkley, L. C. (2009). Perceived social isolation and cognition.  
311 *Trends in cognitive sciences*, *13*(10), 447–454.
- 312 Castelli, L., Di Tella, M., Benfante, A. & Romeo, A. (2020). The spread of covid-19 in  
313 the italian population: Anxiety, depression, and post-traumatic stress symptoms.  
314 *Canadian Journal of psychiatry. Revue Canadienne de Psychiatrie*,  
315 706743720938598–706743720938598.
- 316 Consortium, M. Et al. (2010). The microarray quality control (maqc)-ii study of  
317 common practices for the development and validation of microarray-based  
318 predictive models. *Nature biotechnology*, *28*(8), 827.
- 319 Elmer, T., Mepham, K. & Stadtfeld, C. (2020). Students under lockdown: Comparisons  
320 of students' social networks and mental health before and during the covid-19  
321 crisis in switzerland. *Plos one*, *15*(7), e0236337.
- 322 Festinger, L. (1954). A theory of social comparison processes. *Human relations*, *7*(2),  
323 117–140.
- 324 Friedman, E. M. (2011). Sleep quality, social well-being, gender, and inflammation: An  
325 integrative analysis in a national sample. *Annals of the New York Academy of*  
326 *Sciences*, *1231*, 23.
- 327 Goswick, R. A. & Jones, W. H. (1981). Loneliness, self-concept, and adjustment. *The*  
328 *Journal of Psychology*, *107*(2), 237–240.
- 329 Gualano, M. R., Lo Moro, G., Voglino, G., Bert, F. & Siliquini, R. (2020). Effects of  
330 covid-19 lockdown on mental health and sleep disturbances in italy.  
331 *International journal of environmental research and public health*, *17*(13), 4779.
- 332 Haider, I. I., Tiwana, F. & Tahir, S. M. (2020). Impact of the covid-19 pandemic on  
333 adult mental health. *Pakistan Journal of Medical Sciences*, *36*(COVID19-S4).
- 334 Hall-Lande, J. A., Eisenberg, M. E., Christenson, S. L. & Neumark-Sztainer, D. (2007).  
335 Social isolation, psychological health, and protective factors in adolescence.  
336 *Adolescence*, *42*(166).

- 337 Hawkey, L. C. & Cacioppo, J. T. (2010). Loneliness matters: A theoretical and  
338 empirical review of consequences and mechanisms. *Annals of behavioral*  
339 *medicine*, *40*(2), 218–227.
- 340 Hawkey, L. C. & Capitano, J. P. (2015). Perceived social isolation, evolutionary fitness  
341 and health outcomes: A lifespan approach. *Philosophical Transactions of the*  
342 *Royal Society B: Biological Sciences*, *370*(1669), 20140114.
- 343 Hawkey, L. C., Hughes, M. E., Waite, L. J., Masi, C. M., Thisted, R. A. &  
344 Cacioppo, J. T. (2008). From social structural factors to perceptions of  
345 relationship quality and loneliness: The Chicago health, aging, and social  
346 relations study. *The Journals of Gerontology Series B: Psychological Sciences*  
347 *and Social Sciences*, *63*(6), S375–S384.
- 348 Holt-Lunstad, J., Smith, T. B., Baker, M., Harris, T. & Stephenson, D. (2015).  
349 Loneliness and social isolation as risk factors for mortality: A meta-analytic  
350 review. *Perspectives on psychological science*, *10*(2), 227–237.
- 351 Holwerda, T. J., Deeg, D. J., Beekman, A. T., van Tilburg, T. G., Stek, M. L.,  
352 Jonker, C. & Schoevers, R. A. (2014). Feelings of loneliness, but not social  
353 isolation, predict dementia onset: Results from the Amsterdam study of the  
354 elderly (Amstel). *Journal of Neurology, Neurosurgery & Psychiatry*, *85*(2),  
355 135–142.
- 356 Jackson, J. & Cochran, S. D. (1991). Loneliness and psychological distress. *The Journal*  
357 *of psychology*, *125*(3), 257–262.
- 358 Johns, M. W. (1991). A new method for measuring daytime sleepiness: The Epworth  
359 sleepiness scale. *sleep*, *14*(6), 540–545.
- 360 Jurman, G., Riccadonna, S., Visintainer, R. & Furlanello, C. (2012). Algebraic  
361 comparison of partial lists in bioinformatics. *PloS one*, *7*(5), e36540.
- 362 Kroenke, K., Spitzer, R. L. & Williams, J. B. (2001). The PHQ-9: Validity of a brief  
363 depression severity measure. *Journal of general internal medicine*, *16*(9),  
364 606–613.

- 365 Lau, J. T., Yang, X., Pang, E., Tsui, H., Wong, E. & Wing, Y. K. (2005). Sars-related  
366 perceptions in hong kong. *Emerging infectious diseases*, *11*(3), 417.
- 367 Lee, A. M., Wong, J. G., McAlonan, G. M., Cheung, V., Cheung, C., Sham, P. C.,  
368 Chu, C.-M., Wong, P.-C., Tsang, K. W. & Chua, S. E. (2007). Stress and  
369 psychological distress among sars survivors 1 year after the outbreak. *The*  
370 *Canadian Journal of Psychiatry*, *52*(4), 233–240.
- 371 Lee, P. H., Macfarlane, D. J., Lam, T. H. & Stewart, S. M. (2011). Validity of the  
372 international physical activity questionnaire short form (ipaq-sf): A systematic  
373 review. *International Journal of Behavioral Nutrition and Physical Activity*,  
374 *8*(1), 115.
- 375 Lee, S. M., Kang, W. S., Cho, A.-R., Kim, T. & Park, J. K. (2018). Psychological  
376 impact of the 2015 mers outbreak on hospital workers and quarantined  
377 hemodialysis patients. *Comprehensive psychiatry*, *87*, 123–127.
- 378 Liu, X., Kakade, M., Fuller, C. J., Fan, B., Fang, Y., Kong, J., Guan, Z. & Wu, P.  
379 (2012). Depression after exposure to stressful events: Lessons learned from the  
380 severe acute respiratory syndrome epidemic. *Comprehensive psychiatry*, *53*(1),  
381 15–23.
- 382 Main, A., Zhou, Q., Ma, Y., Luecken, L. J. & Liu, X. (2011). Relations of sars-related  
383 stressors and coping to chinese college students' psychological adjustment during  
384 the 2003 beijing sars epidemic. *Journal of counseling psychology*, *58*(3), 410.
- 385 Mak, I. W. C., Chu, C. M., Pan, P. C., Yiu, M. G. C. & Chan, V. L. (2009). Long-term  
386 psychiatric morbidities among sars survivors. *General hospital psychiatry*, *31*(4),  
387 318–326.
- 388 Matheny Jr, A. P., Wachs, T. D., Ludwig, J. L. & Phillips, K. (1995). Bringing order  
389 out of chaos: Psychometric characteristics of the confusion, hubbub, and order  
390 scale. *Journal of applied developmental psychology*, *16*(3), 429–444.
- 391 Maunder, R. G., Lancee, W. J., Balderson, K. E., Bennett, J. P., Borgundvaag, B.,  
392 Evans, S., Fernandes, C. M., Goldbloom, D. S., Gupta, M., Hunter, J. J. Et al.

- 393 (2006). Long-term psychological and occupational effects of providing hospital  
394 healthcare during sars outbreak. *Emerging infectious diseases*, 12(12), 1924.
- 395 Mushtaq, R., Shoib, S., Shah, T. & Mushtaq, S. (2014). Relationship between loneliness,  
396 psychiatric disorders and physical health? a review on the psychological aspects  
397 of loneliness. *Journal of clinical and diagnostic research: JCDR*, 8(9), WE01.
- 398 Organization, W. H. (2020a). Coronavirus disease (2019) - Weekly Epidemiological  
399 Update.
- 400 Organization, W. H. (2020b). Coronavirus Disease 2019 - Situation Report – 51.
- 401 Pieh, C., Budimir, S. & Probst, T. (2020). The effect of age, gender, income, work, and  
402 physical activity on mental health during coronavirus disease (covid-19)  
403 lockdown in austria. *Journal of psychosomatic research*, 136, 110186.
- 404 Preti, E., Di Mattei, V., Perego, G., Ferrari, F., Mazzetti, M., Taranto, P.,  
405 Di Pierro, R., Madeddu, F. & Calati, R. (2020). The psychological impact of  
406 epidemic and pandemic outbreaks on healthcare workers: Rapid review of the  
407 evidence. *Current psychiatry reports*, 22(8), 1–22.
- 408 Raine, A. & Chen, F. R. (2018). The cognitive, affective, and somatic empathy scales  
409 (cases) for children. *Journal of Clinical Child & Adolescent Psychology*, 47(1),  
410 24–37.
- 411 Richardson, T., Elliott, P. & Roberts, R. (2017). Relationship between loneliness and  
412 mental health in students. *Journal of Public Mental Health*.
- 413 Rossi, R., Socci, V., Talevi, D., Mensi, S., Niolu, C., Pacitti, F., Di Marco, A.,  
414 Rossi, A., Siracusano, A. & Di Lorenzo, G. (2020). Covid-19 pandemic and  
415 lockdown measures impact on mental health among the general population in  
416 italy. *Frontiers in Psychiatry*, 11.
- 417 Russell, D. W. (1996). UCLA loneliness scale (version 3): Reliability, validity, and factor  
418 structure. *Journal of personality assessment*, 66(1), 20–40.
- 419 Sherif, M., Harvey, O., White, B. J., Hood, W. R. & Sherif, C. W. (1961). Intergroup  
420 conflict and cooperation. *The robbers cave experiment. Oklahoma*.



- 421 Spitzer, R. L., Kroenke, K., Williams, J. B. & Löwe, B. (2006). A brief measure for  
422 assessing generalized anxiety disorder: The gad-7. *Archives of internal medicine*,  
423 *166*(10), 1092–1097.
- 424 Staw, B. M., Sandelands, L. E. & Dutton, J. E. (1981). Threat rigidity effects in  
425 organizational behavior: A multilevel analysis. *Administrative science quarterly*,  
426 *501*–524.
- 427 Stravynski, A. & Boyer, R. (2001). Loneliness in relation to suicide ideation and  
428 parasuicide: A population-wide study. *Suicide and life-threatening behavior*,  
429 *31*(1), 32–40.
- 430 Valtorta, N. K., Kanaan, M., Gilbody, S., Ronzi, S. & Hanratty, B. (2016). Loneliness  
431 and social isolation as risk factors for coronary heart disease and stroke:  
432 Systematic review and meta-analysis of longitudinal observational studies. *Heart*,  
433 *102*(13), 1009–1016.
- 434 Wang, C., Pan, R., Wan, X., Tan, Y., Xu, L., McIntyre, R. S., Choo, F. N., Tran, B.,  
435 Ho, R., Sharma, V. K. Et al. (2020). A longitudinal study on the mental health  
436 of general population during the covid-19 epidemic in china. *Brain, behavior, and*  
437 *immunity*.
- 438 Zhang, Y. & Ma, Z. F. (2020). Impact of the covid-19 pandemic on mental health and  
439 quality of life among local residents in liaoning province, china: A cross-sectional  
440 study. *International journal of environmental research and public health*, *17*(7),  
441 2381.

| Sample | Week 3 | Week 4 | Week 5 | Week 6 | Week 7 | Week 8+ | TOT |
|--------|--------|--------|--------|--------|--------|---------|-----|
| UK     | 38     | 78     | 75     | 69     | 97     | 25      | 382 |
| Greece | 7      | 86     | 18     | 17     | 1      | 0       | 129 |

Table 1

*Distribution of participants from the UK and Greece by week.*

| Score                         | Description                                                                                          | Reference                                                                                                                                                                                            |
|-------------------------------|------------------------------------------------------------------------------------------------------|------------------------------------------------------------------------------------------------------------------------------------------------------------------------------------------------------|
| Mild activity difference      | Difference between days of mild physical activity post- and pre- COVID-19 lockdown.                  | <i>International Physical Activity Questionnaire – Short Form</i> (IPAQ-SF, 6-items) (P. H. Lee et al., 2011)                                                                                        |
| Mild activity time difference | Difference between minutes of mild physical activity post- and pre- COVID-19 lockdown.               | <i>International Physical Activity Questionnaire – Short Form</i> (IPAQ-SF, 6-items) (P. H. Lee et al., 2011)                                                                                        |
| Moderate activity difference  | Difference between days of moderate physical activity post- and pre- COVID-19 lockdown.              | <i>International Physical Activity Questionnaire – Short Form</i> (IPAQ-SF, 6-items) (P. H. Lee et al., 2011)                                                                                        |
| Sleep quality                 | Self-reported sleep quality and quantity, where higher scores reflect better sleep quality.          | <i>Pittsburgh Sleep Quality Index</i> (2-items) (Buysse et al., 1989), <i>Eppworth Sleepiness Scale</i> (Johns, 1991), <i>Subjective and Objective Sleepiness Scale</i> (Åkerstedt & Gillberg, 1990) |
| Empathy                       | Self-reported affective, cognitive, and somatic empathy, where higher scores reflect higher empathy. | <i>Cognitive, Affective, Somatic Empathy Scale</i> (CASES, 30-items) (Raine & Chen, 2018)                                                                                                            |
| Anxiety                       | Higher scores reflect higher anxiety.                                                                | <i>General Anxiety Disorder-7</i> (GAD-7) (Spitzer et al., 2006)                                                                                                                                     |
| Depression                    | Higher scores reflect higher depression.                                                             | <i>Patient Health Questionnaire-9</i> (PHQ-9, 9-items) (Kroenke et al., 2001)                                                                                                                        |
| Perceived loneliness          | Higher scores reflect higher perceived loneliness.                                                   | <i>Loneliness Questionnaire</i> (LQ, 20-items) (Russell, 1996)                                                                                                                                       |
| Living conditions/environment | Higher scores reflect more chaotic home environments.                                                | <i>Chaos, Hubbub, and Order Scale and Health Risk Behaviors</i> (CHAOS, 6-items) (Matheny Jr et al., 1995)                                                                                           |
| Beliefs                       | Perceived effectiveness of govern-                                                                   | Summed 9-items on COVID-19                                                                                                                                                                           |

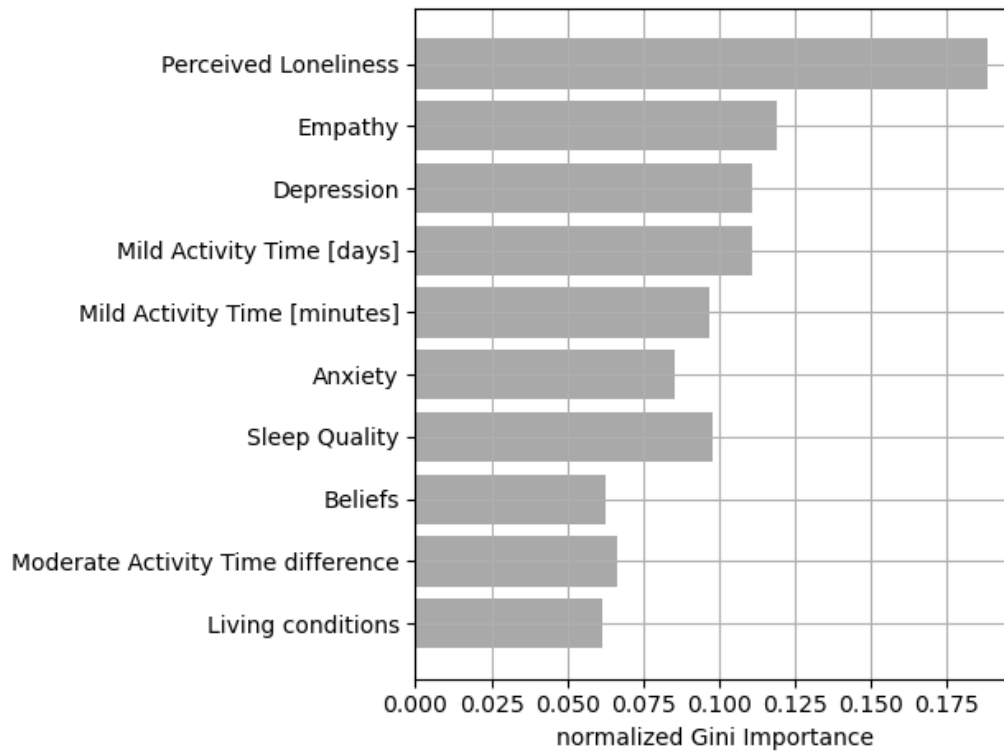

Figure 1. Average importance of the selected variables.

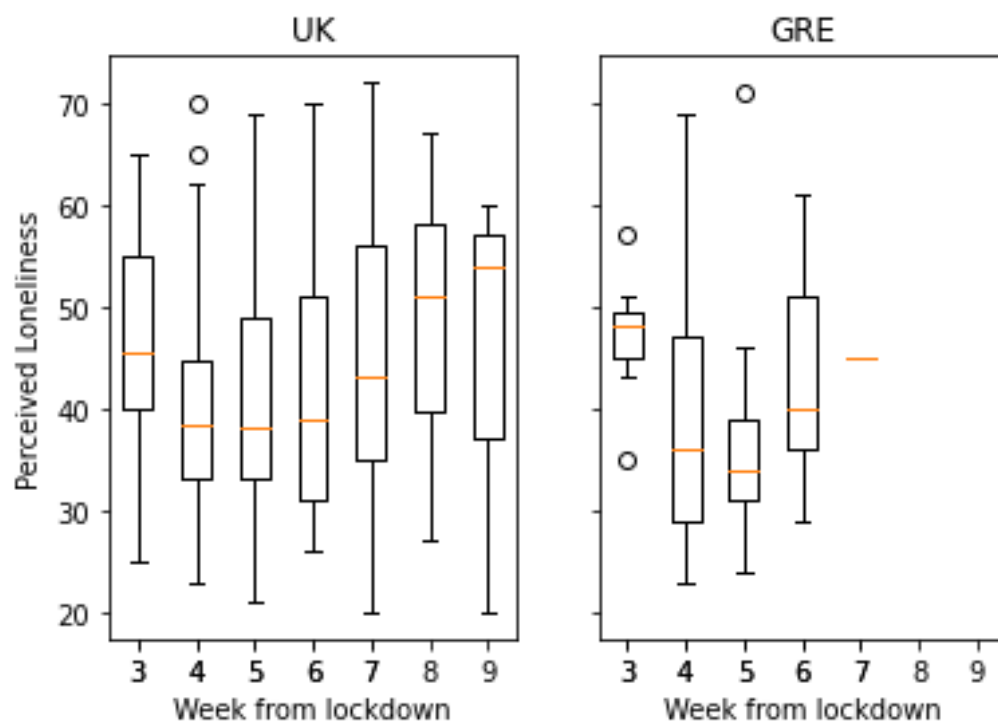

Figure 2. Distribution of perceived loneliness scores for each week for participants from the UK (left) and Greece (right).

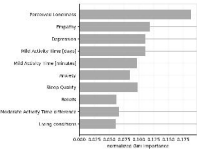

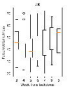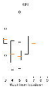

Source: https://www.medrxiv.org/content/10.1101/2020.11.26.20239103v1.full.pdf
